# Supplementary material for: IGFBP5 is released by senescent cells and is internalized by healthy cells, promoting their senescence through interaction with retinoic receptors
Source: PubMed Central journal article supplement (PMC10863175; doi:10.1186/s12964-024-01469-1), 2024-02-13

## **Supplementary File 6**

35kDa

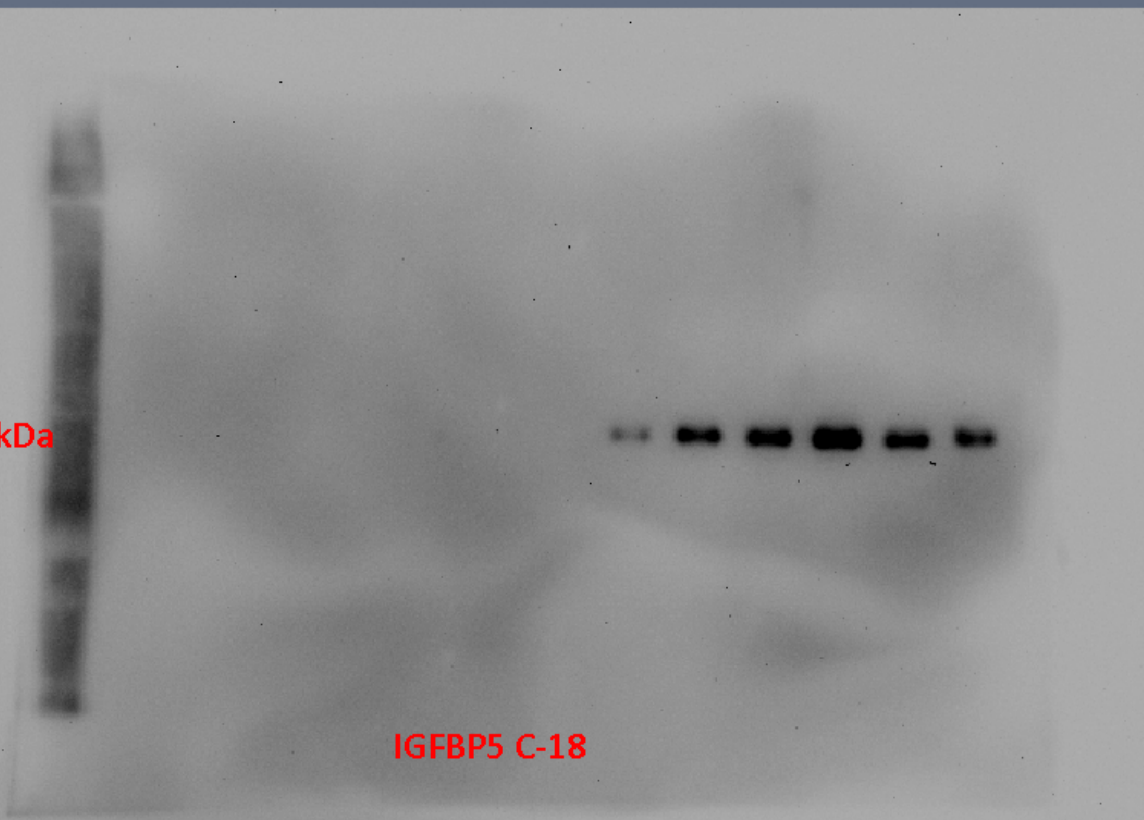

IGFBP5 C-18

35kDa

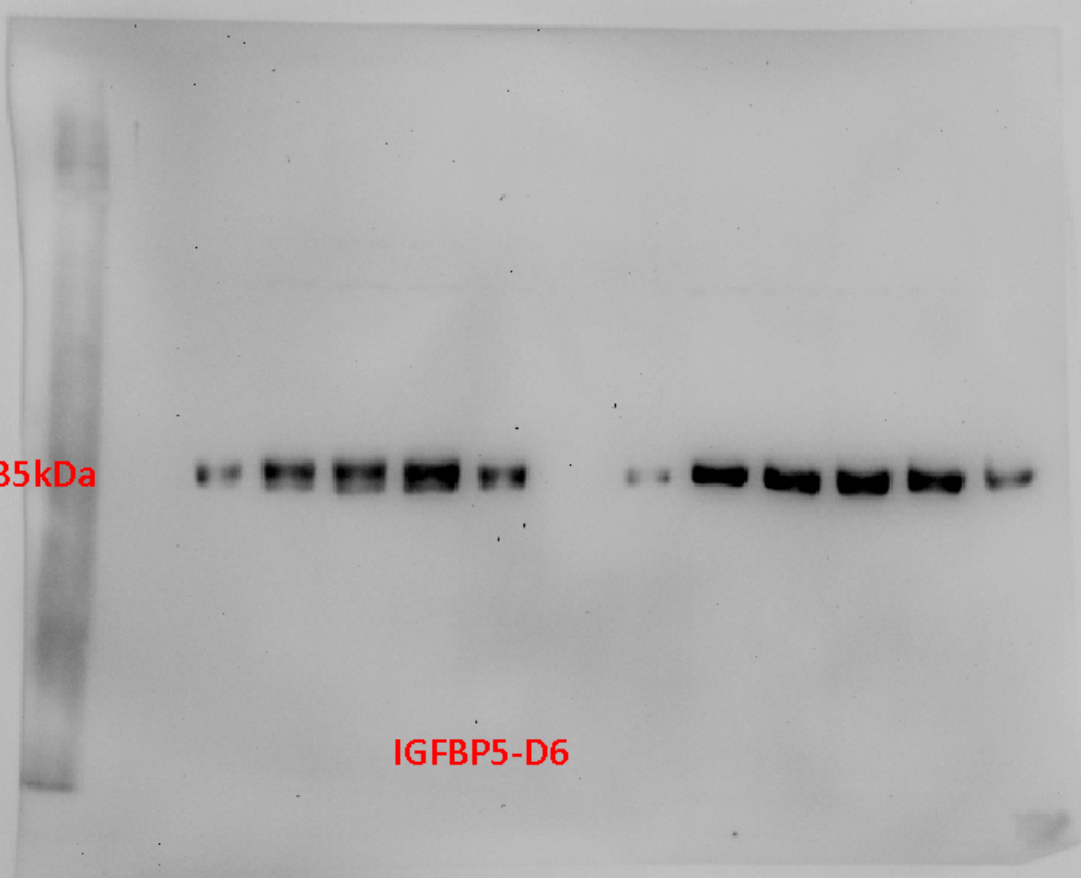

IGFBP5-D6

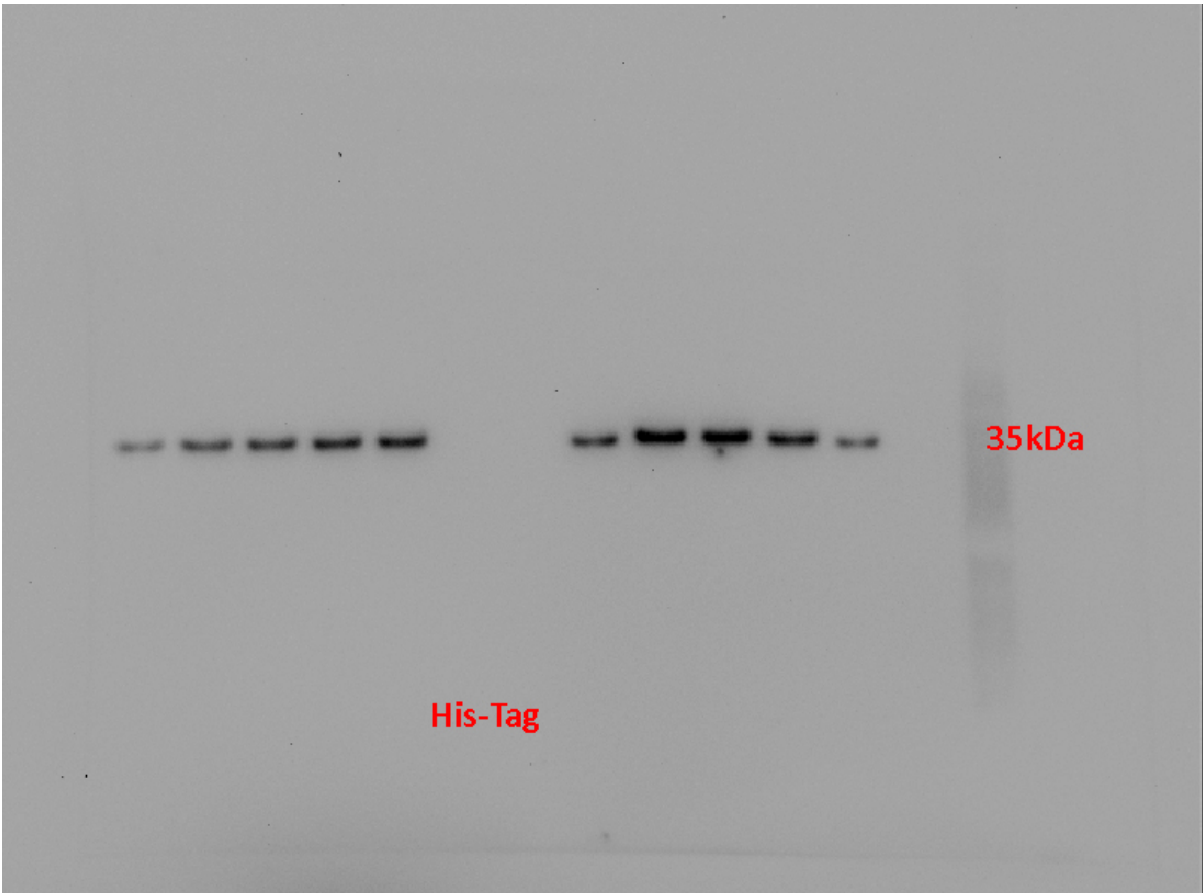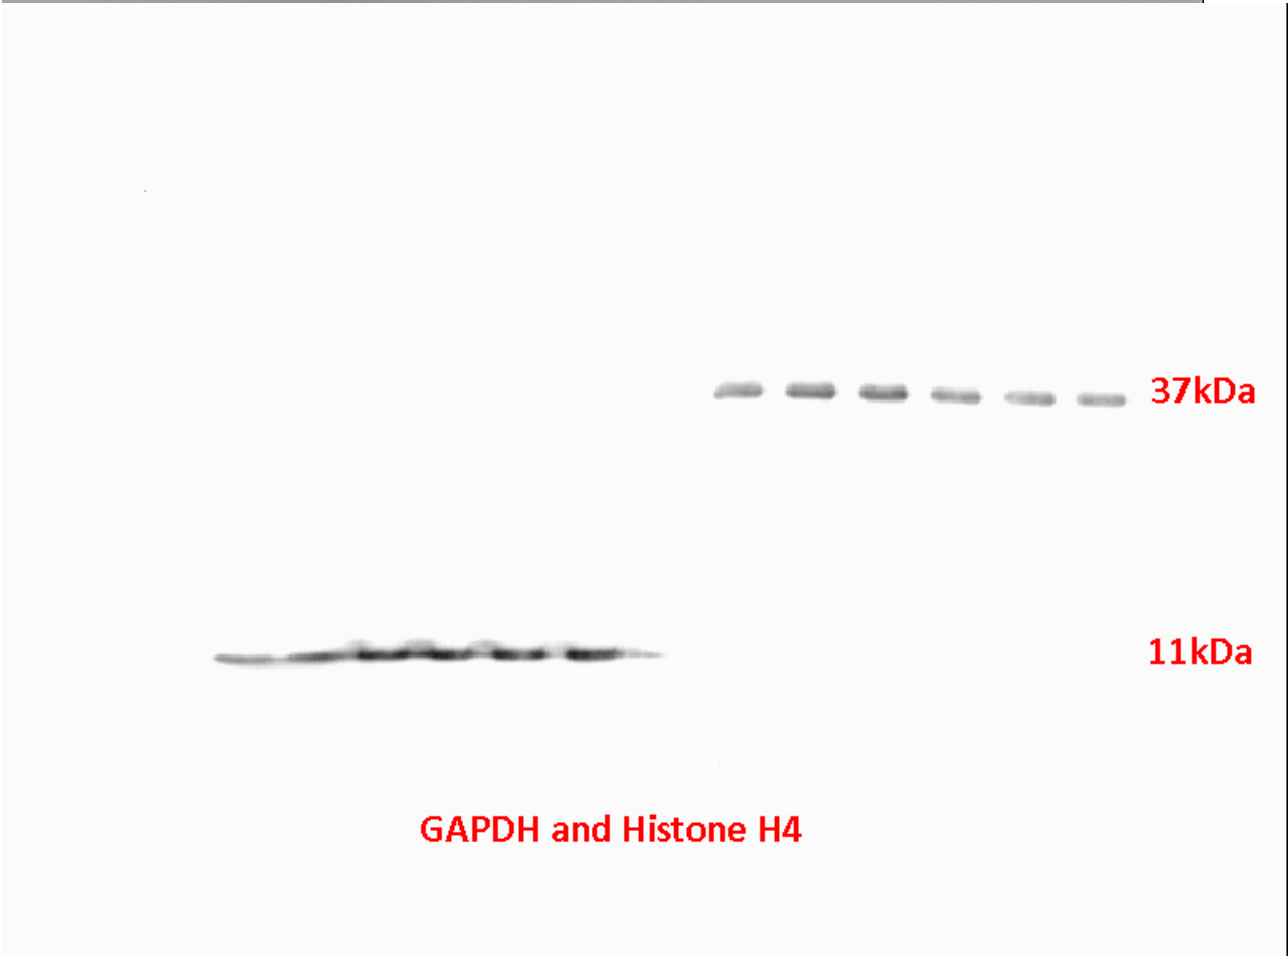

**IP:IGFBP5**

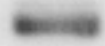

**52kDa**

**WB RXR $\alpha$**

**IP:IGFBP5**

**52kDa**

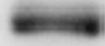

**RAR $\alpha$**

**IP:RXR $\alpha$**

**IP:RAR $\alpha$**

**35kDa**

**IGFBP5**

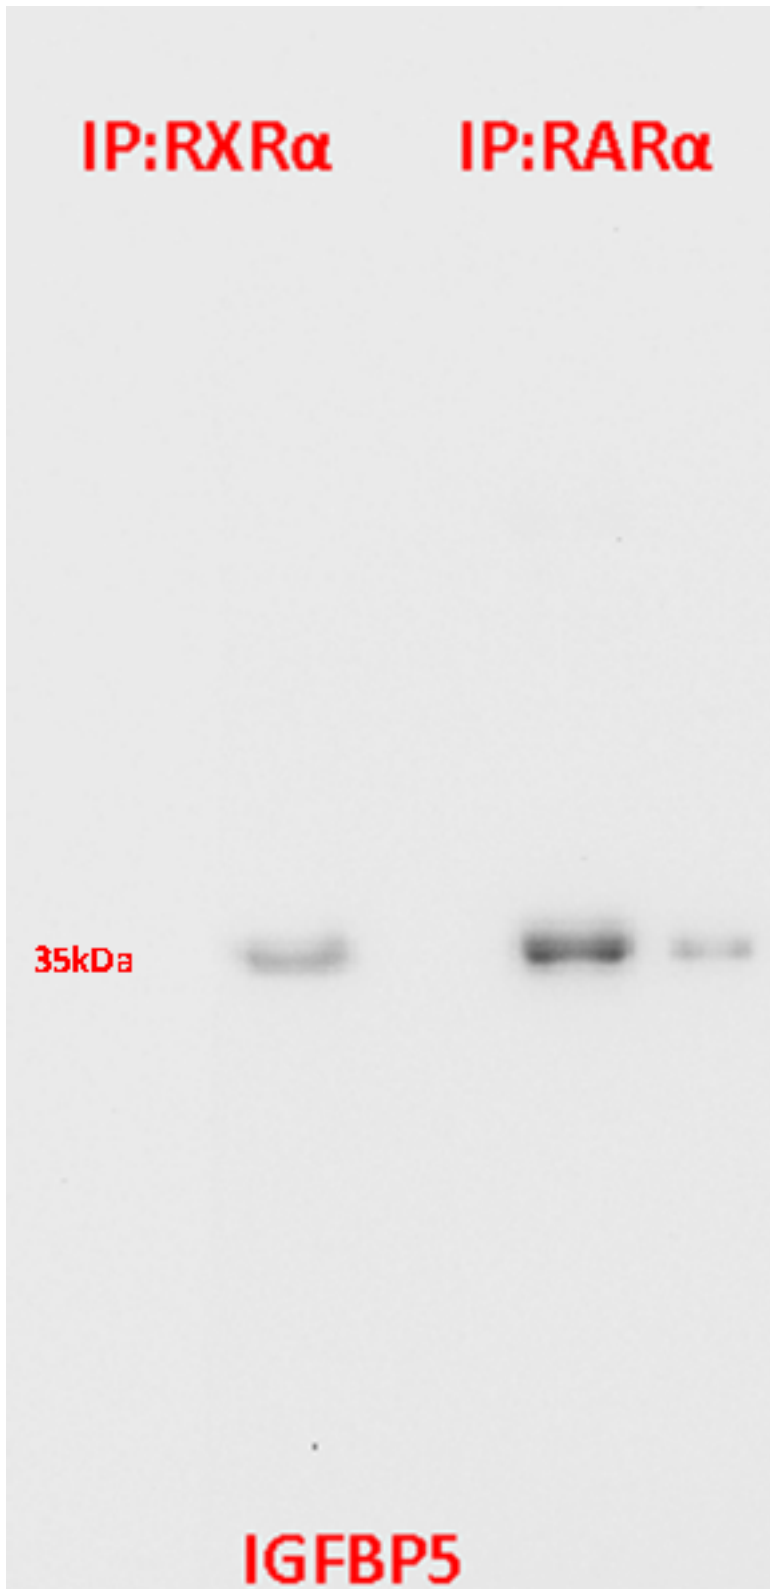

Supplement: 12964_2024_1469_MOESM6_ESM.pdf [file 12964_2024_1469_MOESM6_ESM.pdf]
